# Supplementary material
Source: publisher figshare collection journal article supplement (https://gsapubs.figshare.com/ndownloader/files/23317817)
Supplement: Supplementary file 1 [file 23317817]

## BENEMERITO (247 Ma, zircon U–Pb\*)

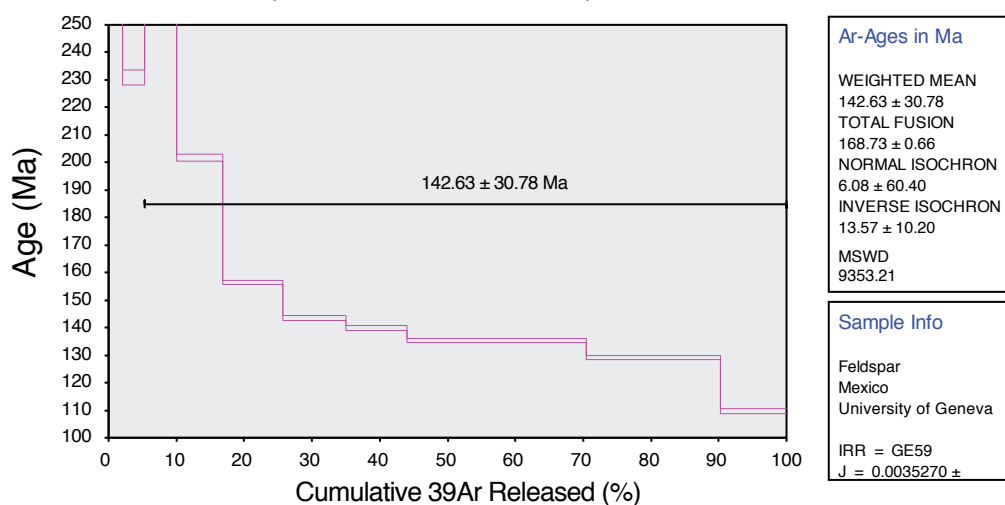

## TRINCHERAS (256 Ma, zircon U–Pb\*)

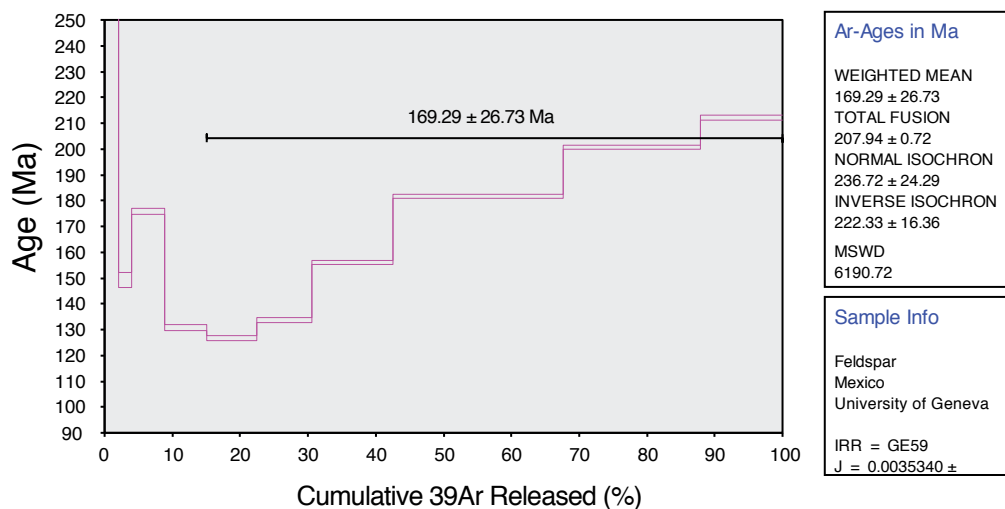

## LINARES (254 Ma, zircon U–Pb\*)

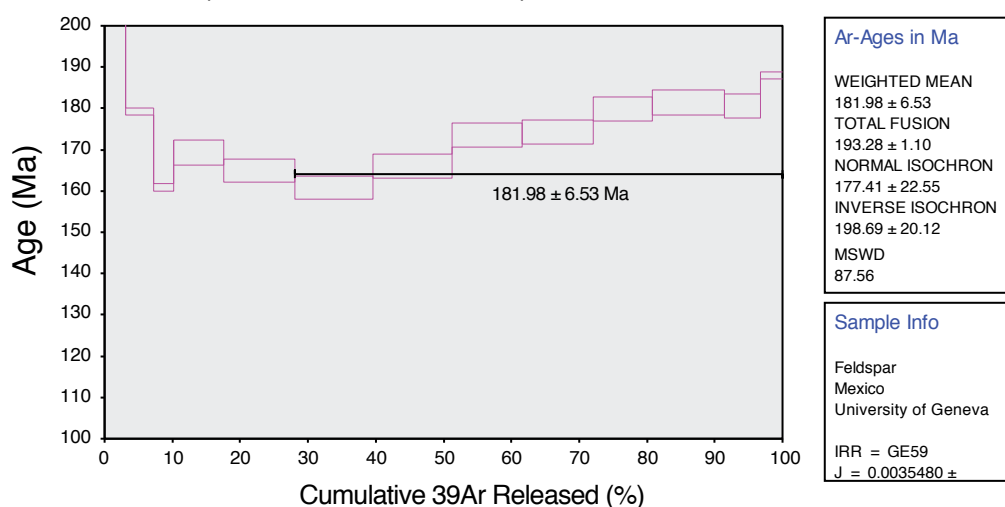

(\*) Zircon U–Pb ages from Coombs et al. (this volume)

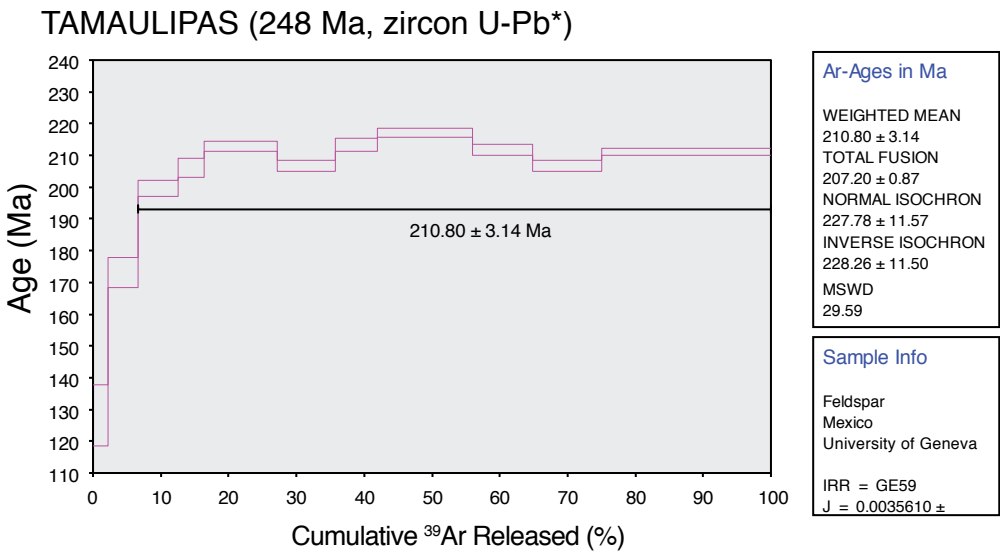

Appendix DR2b

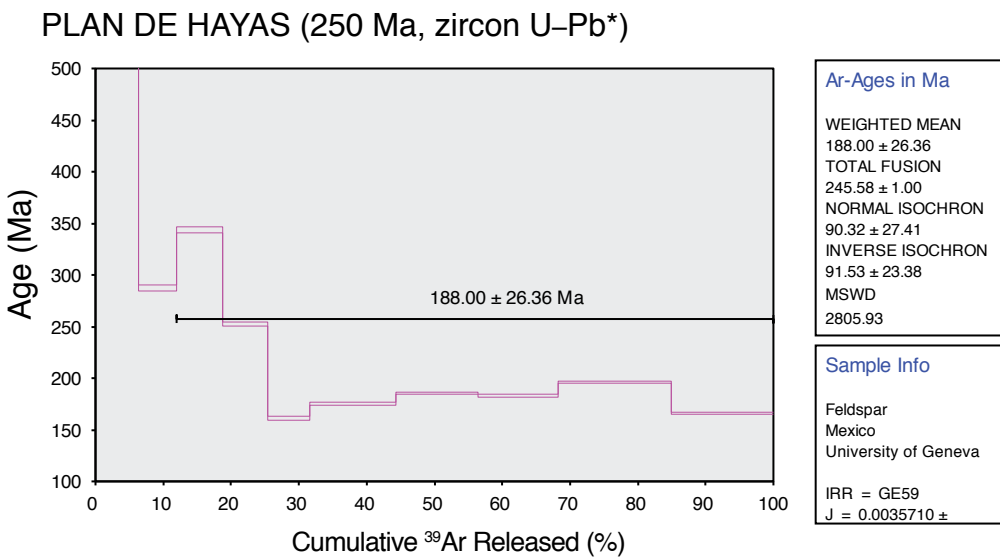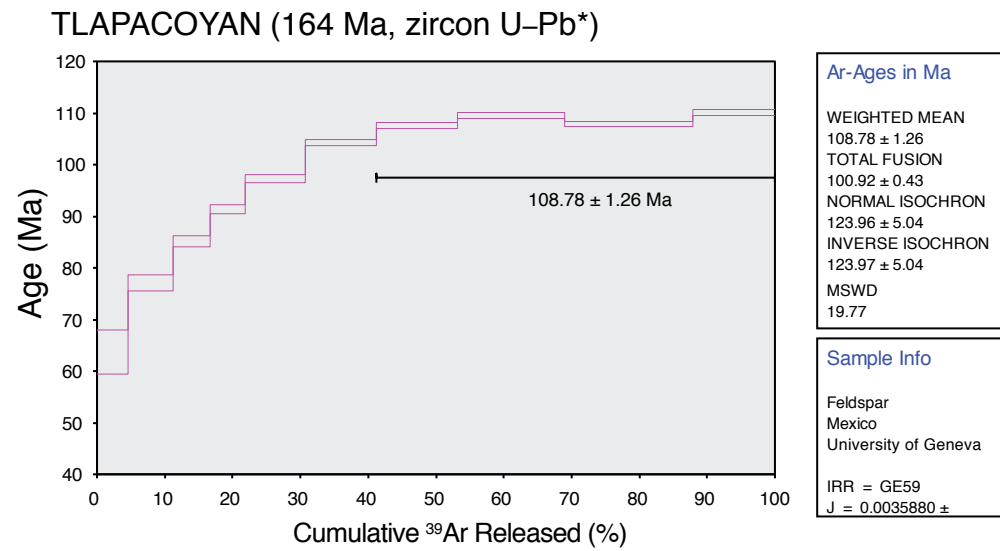

(\*) Zircon U-Pb ages from Coombs et al. (this volume)

5-5-2 CHIAPAS BATHOLITH (Permo–Triassic)

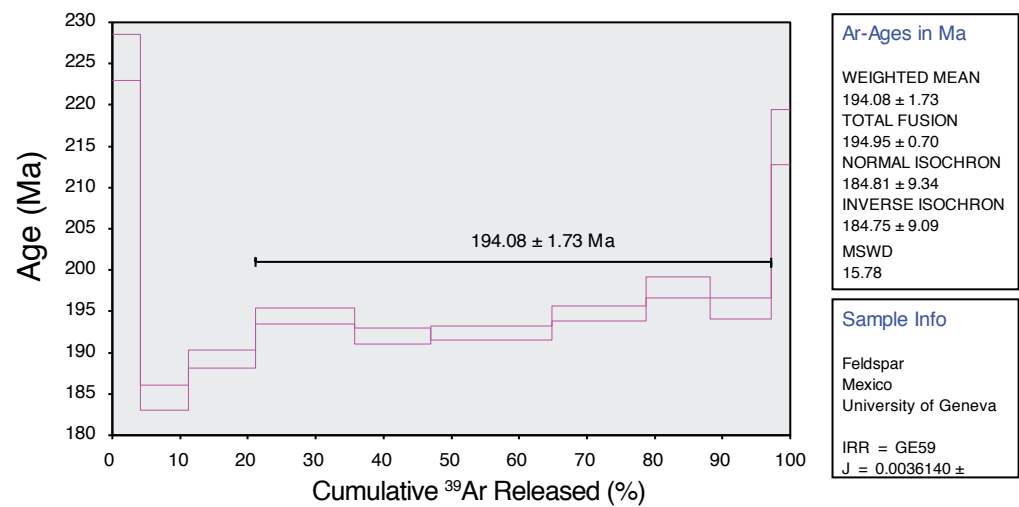

5-5-9 CHIAPAS BATHOLITH (256 Ma, U–Pb\*)

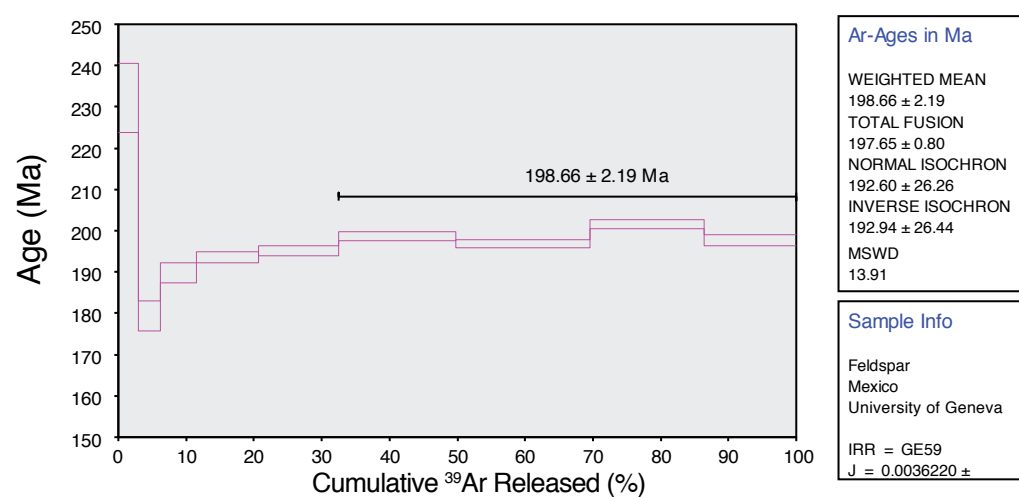

5-4-5A CHIAPAS BATHOLITH (248 Ma, U–Pb\*)

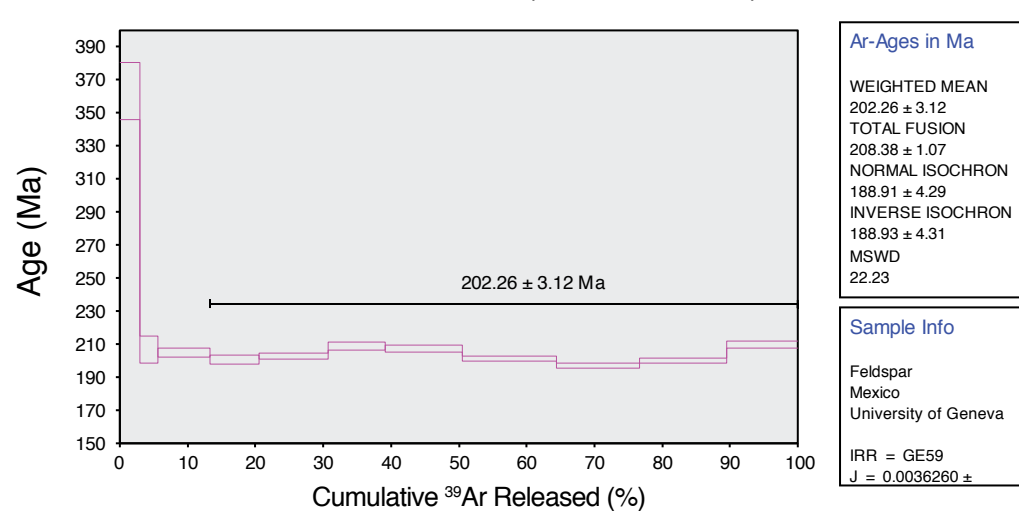

(\*) Zircon U–Pb ages from U. Martens (2017, personal commun.)
